# Supplementary material
Source: MDPI journal article supplement (https://www.mdpi.com/2072-4292/13/16/3323)
Supplement: s1 [file s1]

**CAPTION TO SUPPLEMENTARY FIGURE S1:** Distribution of earthquakes epicentres and magnitude [from Iside Database: <http://iside.rm.ingv.it/iside/>] in the surroundings of the Sarno plain plotted on Google Earth image. Earthquakes reported in this map occurred from 1st January 1985 to 4th February 2021.
