# Supplementary material
Source: MDPI journal article supplement (https://www.mdpi.com/2072-4292/13/16/3323)
Supplement: s1 [file s1]

**CAPTION TO SUPPLEMENTARY FIGURE S2:** Stratigraphy of the 71 boreholes used in this study. Borehole location is reported in Fig. 4 of the main text. Stratigraphical units have been grouped according to Fig. 5.
