# Supplementary material
Source: MDPI journal article supplement (https://www.mdpi.com/2072-4292/13/16/3323)
Supplement: s1 [file s1]

Archive with 4 entries (4 files):
- caption to Supplementary Figure S1.pdf
- caption to Supplementary Figure S2.pdf
- Supplementary Figure S1.jpg
- Supplementary Figure S2.jpg
