# Supplementary material
Source: MDPI journal article supplement (https://www.mdpi.com/2072-4292/13/16/3323)

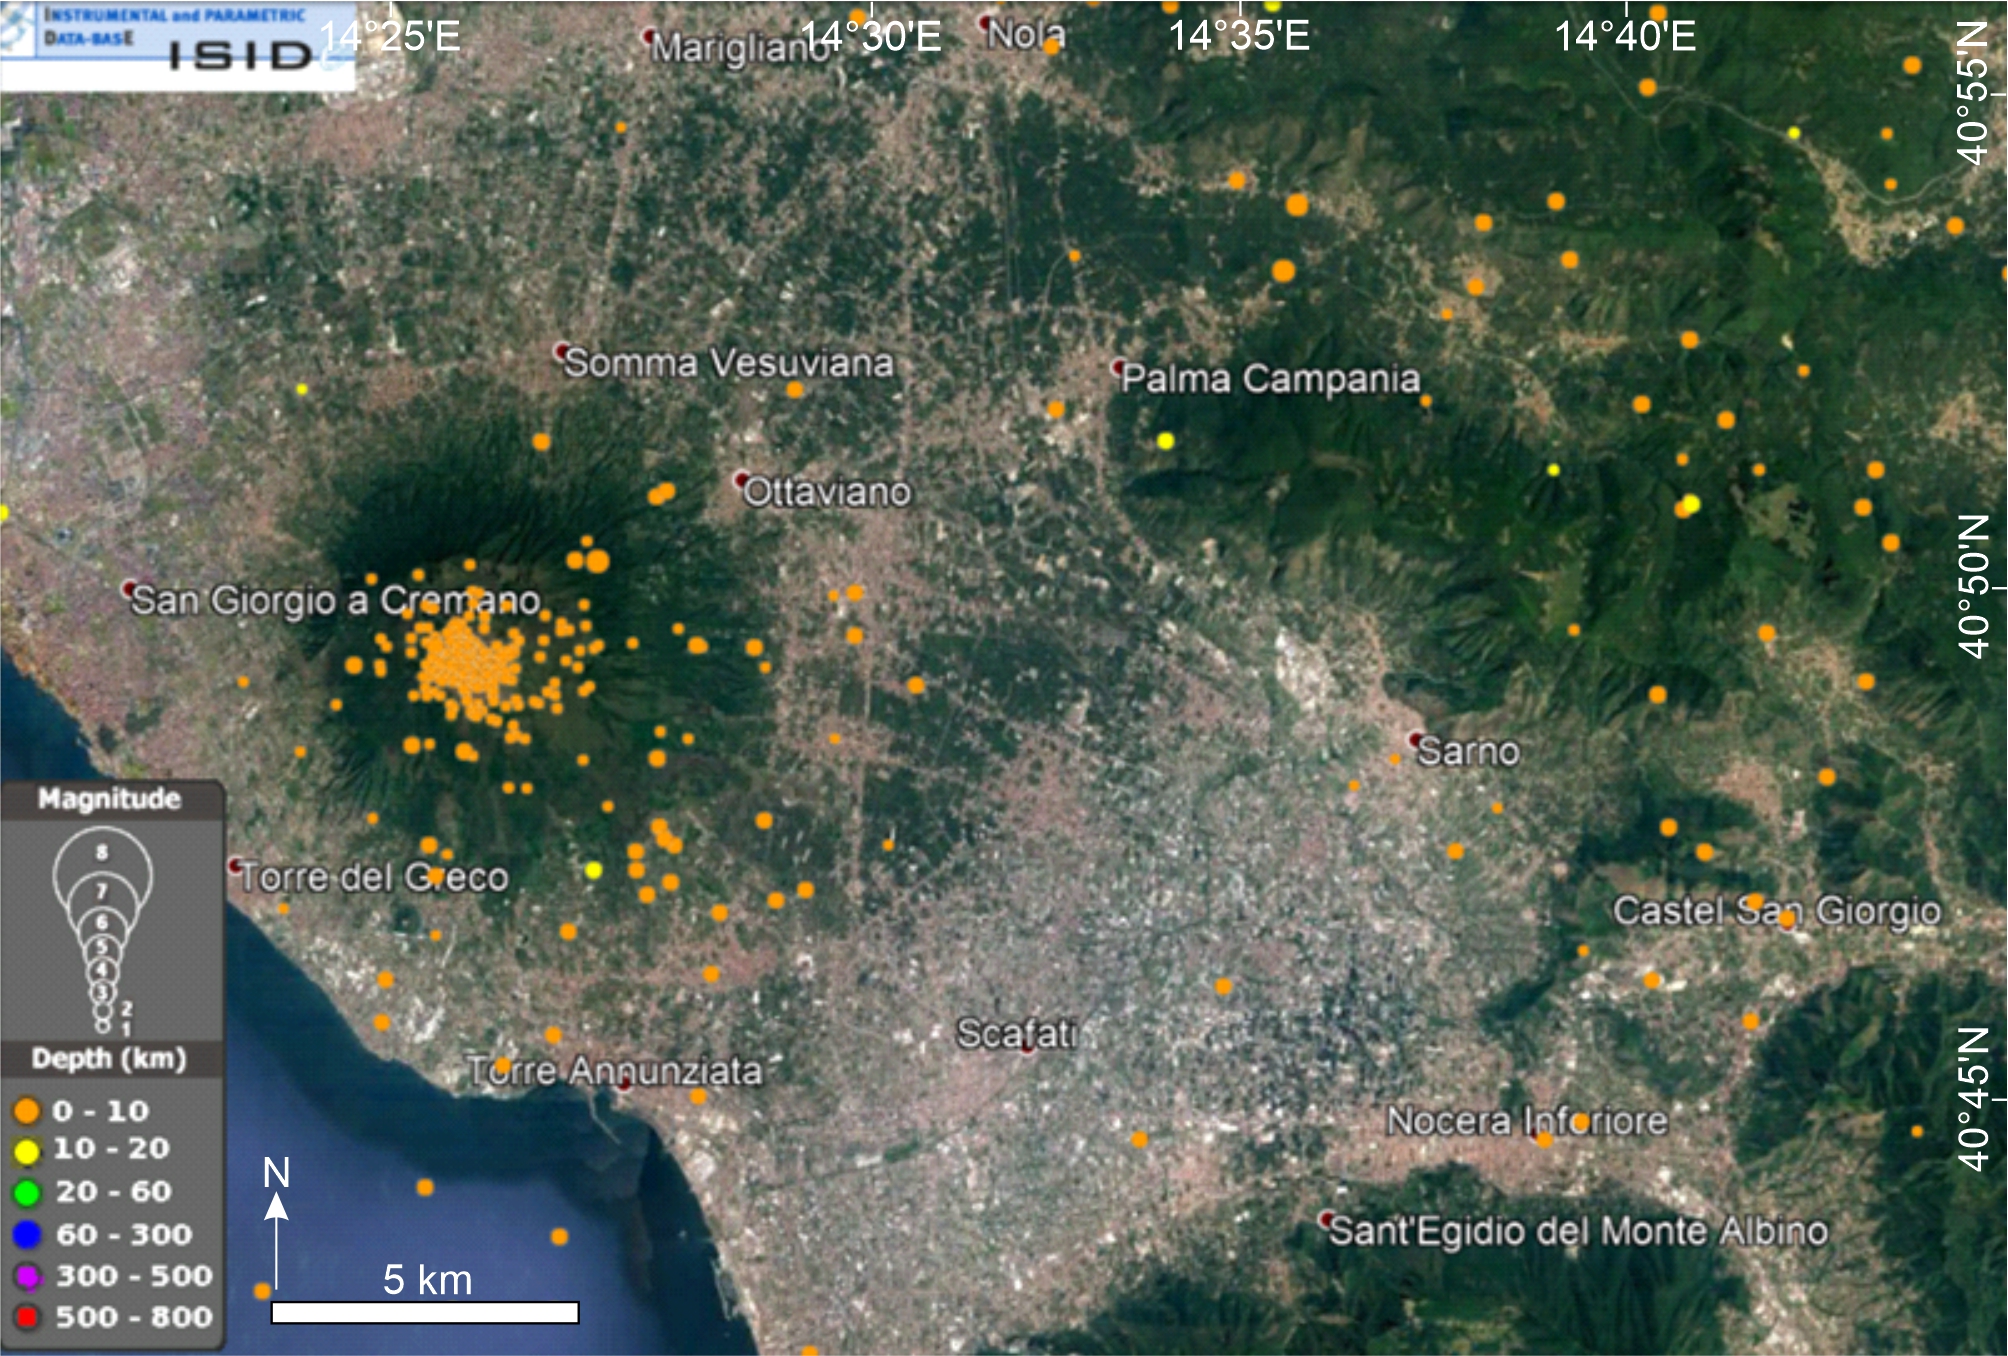

Supplement: s1 [file s1 › Supplementary Figure S1.jpg]

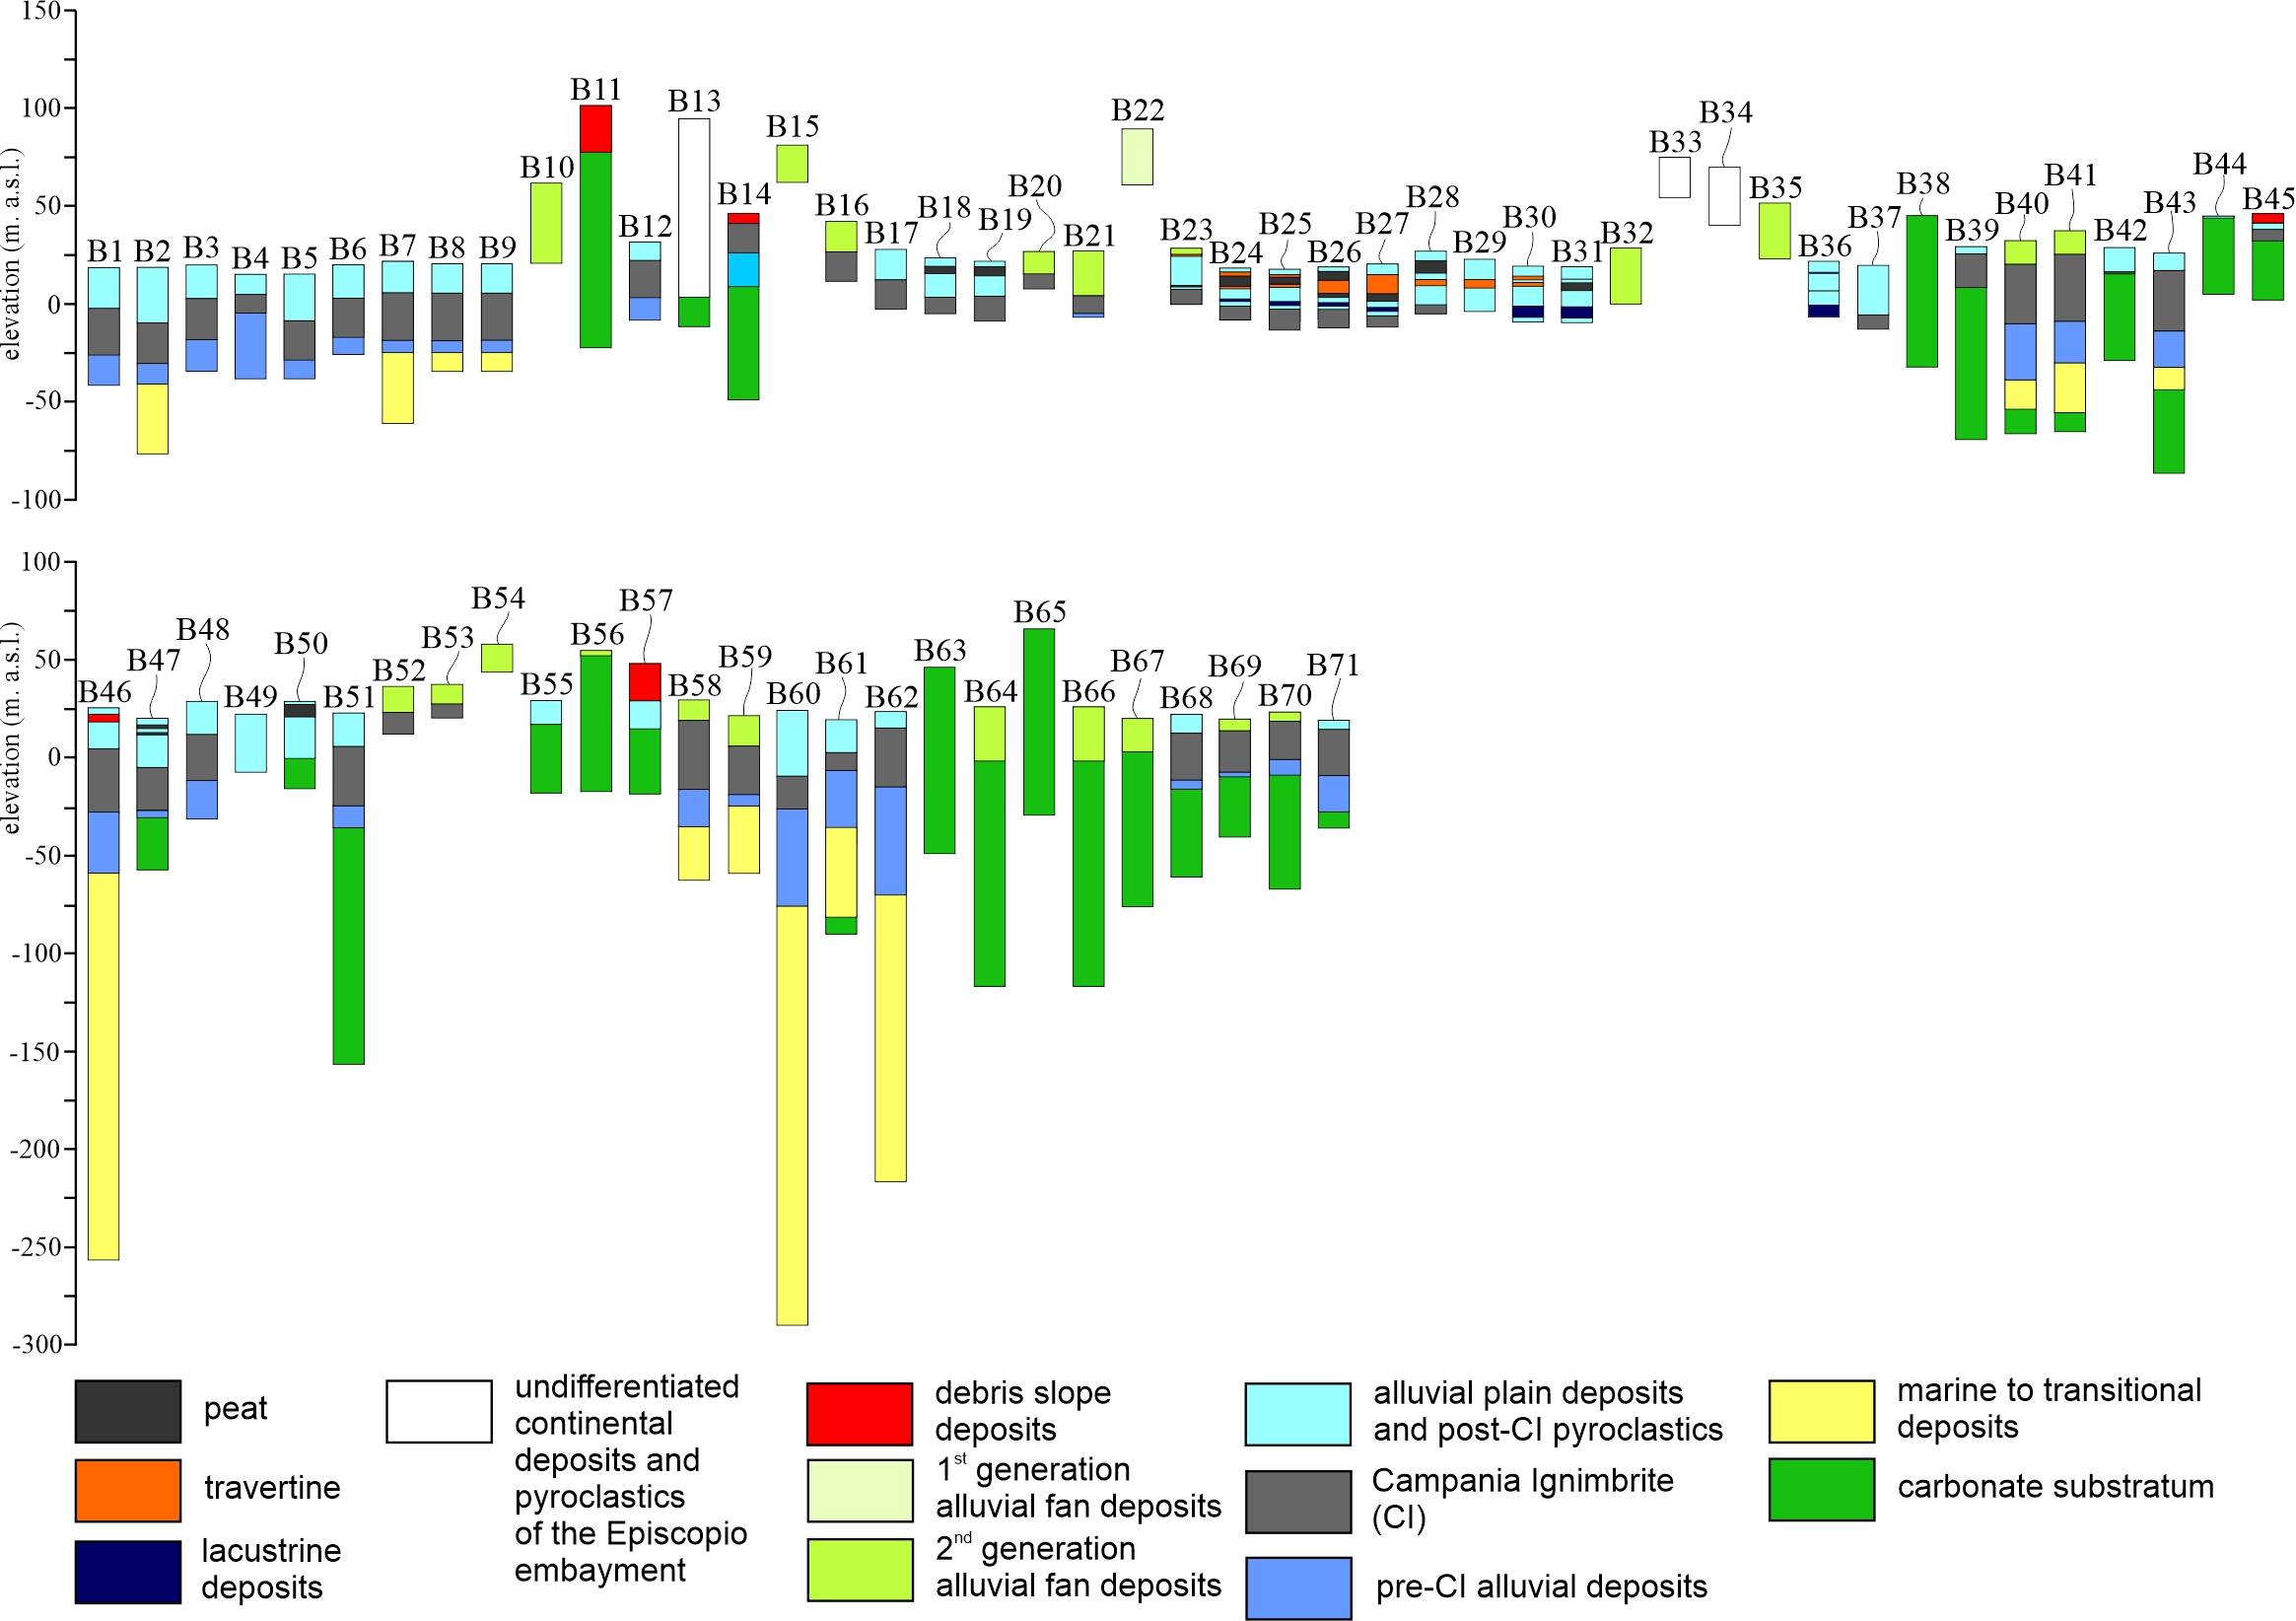

Supplement: s1 [file s1 › Supplementary Figure S2.jpg]
